# Supplementary material for: An artificial intelligence model to identify snakes from across the world: Opportunities and challenges for global health and herpetology
Source: PLoS Negl Trop Dis. 2022 Aug 15;16(8):e0010647. doi: 10.1371/journal.pntd.0010647 (PMC9426939; doi:10.1371/journal.pntd.0010647)
Supplement: S3 Data — (CSV) [file pntd.0010647.s009.csv]

	X	country	F1.Country	iso3	perc.species.covered	continent	geo_subregion
1	0	afghanistan	0.93875	AFG	57.1428571428571	Asia	NA
2	1	albania	0.97	ALB	94.1176470588235	Europe	Central Europe
3	2	algeria	0.938666666666667	DZA	67.741935483871	Africa	Northern Africa
4	3	angola	0.954242424242424	AGO	28.030303030303	Africa	Southern Africa
5	4	anguilla	1	AIA	50	Central America/Caribbean	NA
6	5	antigua and barbuda	0.75	ATG	37.5	Central America/Caribbean	NA
7	6	argentina	0.891794871794872	ARG	32.3529411764706	South America	South America
8	7	armenia	0.978571428571429	ARM	64	Asia	Eastern Europe
9	8	aruba	0.68	ABW	75	Central America/Caribbean	NA
10	9	australia	0.88859375	AUS	34.070796460177	Oceania	Australia + New Zealand
11	10	austria	0.97625	AUT	100	Europe	Western Europe
12	11	azerbaijan	0.982352941176471	AZE	63.6363636363636	Asia	Eastern Europe
13	12	bahamas	0.958	BHS	41.6666666666667	Central America/Caribbean	NA
14	13	bangladesh	0.929756097560976	BGD	53.8461538461538	Asia	South Asia
15	14	barbados	0.99	BRB	20	Central America/Caribbean	NA
16	15	belarus	0.983333333333333	BLR	100	Europe	Eastern Europe
17	16	belgium	0.9825	BEL	100	Europe	Western Europe
18	17	belize	0.919137931034483	BLZ	78.6666666666667	Central America/Caribbean	Meso America
19	18	benin	0.940769230769231	BEN	23.3766233766234	Africa	Western Africa
20	19	bhutan	0.94625	BTN	50	Asia	NA
21	20	bolivia	0.909491525423729	BOL	38.0681818181818	South America	South America
22	21	bosnia and herzegovina	0.98125	BIH	100	Europe	NA
23	22	botswana	0.969090909090909	BWA	48.5714285714286	Africa	Southern Africa
24	23	brazil	0.900704225352113	BRA	19.0709046454768	South America	South America
25	24	brunei	0.937391304347826	BRN	75.7575757575758	Asia	NA
26	25	bulgaria	0.971764705882353	BGR	89.4736842105263	Europe	Central Europe
27	26	burkina faso	0.925	BFA	21.1538461538462	Africa	Western Africa
28	27	burma	0.953636363636364	MMR	44.8275862068966	Asia	NA
29	28	burundi	0.911764705882353	BDI	37.7777777777778	Africa	Eastern Africa
30	29	cambodia	0.930192307692308	KHM	53.921568627451	Asia	South East Asia
31	30	cameroon	0.9355	CMR	16.25	Africa	Central Africa
32	31	canada	0.992592592592593	CAN	100	North America	North America
33	32	cayman islands	0.9975	CYM	38.4615384615385	Central America/Caribbean	NA
34	33	central african republic	0.941363636363636	CAF	22.3076923076923	Africa	NA
35	34	chad	0.888	TCD	24.5283018867924	Africa	Central Africa
36	35	chile	0.872	CHL	62.5	South America	South America
37	36	china	0.946049382716049	CHN	38.5496183206107	Asia	Northeast Asia
38	37	colombia	0.912421052631579	COL	33.1230283911672	South America	South America
39	38	costa rica	0.96	CRI	48.2993197278912	Central America/Caribbean	Meso America
40	39	croatia	0.975	HRV	100	Europe	Central Europe
41	40	cuba	0.994	CUB	13.6363636363636	Central America/Caribbean	Caribbean
42	41	cyprus	0.975555555555556	CYP	83.3333333333333	Asia	Central Europe
43	42	czech republic	0.988	CZE	100	Europe	NA
44	43	democratic republic of the congo	0.9484375	COD	21.195652173913	Africa	NA
45	44	denmark	0.983333333333333	DNK	100	Europe	Western Europe
46	45	djibouti	0.875	DJI	40	Africa	Eastern Africa
47	46	dominica	0.625	DMA	40	Central America/Caribbean	NA
48	47	dominican republic	0.8	DOM	4.7619047619048	Central America/Caribbean	NA
49	48	east timor	0.995	TLS	64.2857142857143	Asia	NA
50	49	ecuador	0.903943661971831	ECU	32.6359832635983	South America	South America
51	50	egypt	0.952222222222222	EGY	56.7567567567568	Africa	Northern Africa
52	51	el salvador	0.955	SLV	62.8205128205128	Central America/Caribbean	Meso America
53	52	equatorial guinea	0.998571428571429	GNQ	27.027027027027	Africa	NA
54	53	eritrea	0.962142857142857	ERI	35.7142857142857	Africa	Eastern Africa
55	54	estonia	0.983333333333333	EST	100	Europe	Central Europe
56	55	ethiopia	0.943	ETH	21.4285714285714	Africa	Eastern Africa
57	56	fiji	0.996666666666667	FJI	44.4444444444444	Oceania	South Pacific
58	57	finland	0.983333333333333	FIN	100	Europe	Western Europe
59	58	france	0.954375	FRA	93.75	Europe	Western Europe
60	59	french guiana	0.887647058823529	GUF	59.1836734693878	South America	NA
61	60	gabon	0.988	GAB	18.1818181818182	Africa	Central Africa
62	61	gambia	0.924	GMB	22.6415094339623	Africa	NA
63	62	georgia	0.98125	GEO	66.6666666666667	Asia	Eastern Europe
64	63	germany	0.982857142857143	DEU	100	Europe	Western Europe
65	64	ghana	0.941538461538462	GHA	17.1171171171171	Africa	Western Africa
66	65	greece	0.978181818181818	GRC	96	Europe	Western Europe
67	66	grenada	0.86125	GRD	57.1428571428571	Central America/Caribbean	NA
68	67	guadeloupe	0.99	GLP	12.5	Central America/Caribbean	NA
69	68	guatemala	0.948133333333333	GTM	51.3513513513513	Central America/Caribbean	Meso America
70	69	guinea bissau	0.918888888888889	GNB	28.5714285714286	Africa	NA
71	70	guinea	0.924	GIN	22.9357798165138	Africa	Western Africa
72	71	guyana	0.907959183673469	GUY	57.6086956521739	South America	South America
73	72	haiti	0.4	HTI	14.8148148148148	Central America/Caribbean	Caribbean
74	73	honduras	0.93972602739726	HND	48.6842105263158	Central America/Caribbean	Meso America
75	74	hong kong	0.938529411764706	HKG	73.469387755102	Asia	NA
76	75	hungary	0.978571428571429	HUN	100	Europe	Central Europe
77	76	india	0.939714285714286	IND	29.5238095238095	Asia	South Asia
78	77	indonesia	0.942588235294118	IDN	28.3707865168539	Asia	South East Asia
79	78	iran	0.9903125	IRN	43.4782608695652	Asia	South Asia
80	79	iraq	0.975	IRQ	56.25	Asia	Mashriq
81	80	israel	0.951578947368421	ISR	51.063829787234	Asia	Western Europe
82	81	italy	0.982727272727273	ITA	100	Europe	Western Europe
83	82	ivory coast	0.935833333333333	CIV	17.3076923076923	Africa	NA
84	83	jamaica	1	JAM	9.09090909090909	Central America/Caribbean	Caribbean
85	84	japan	0.986875	JPN	41.8604651162791	Asia	Northeast Asia
86	85	jordan	0.979411764705882	JOR	48.8888888888889	Asia	Mashriq
87	86	kazakhstan	0.990714285714286	KAZ	76.1904761904762	Asia	Central Asia
88	87	kenya	0.946071428571429	KEN	25.1968503937008	Africa	Eastern Africa
89	88	kosovo	0.97125	NA	100	Europe	NA
90	89	kuwait	0.998	KWT	81.8181818181818	Asia	Arabian Peninsula
91	90	kyrgyzstan	0.99875	KGZ	66.6666666666667	Asia	Central Asia
92	91	laos	0.924259259259259	LAO	56.1904761904762	Asia	South East Asia
93	92	latvia	0.983333333333333	LVA	100	Europe	Central Europe
94	93	lebanon	0.978333333333333	LBN	52	Asia	Mashriq
95	94	lesotho	0.998333333333333	LSO	54.5454545454545	Africa	NA
96	95	liberia	0.911428571428571	LBR	18.4615384615385	Africa	NA
97	96	libya	0.930909090909091	LBY	66.6666666666667	Africa	NA
98	97	lithuania	0.983333333333333	LTU	100	Europe	Central Europe
99	98	luxembourg	0.98	LUX	100	Europe	Western Europe
100	99	macedonia	0.974375	MKD	100	Europe	Central Europe
101	100	madagascar	0.963333333333333	MDG	11.8811881188119	Africa	Western Indian Ocean
102	101	malawi	0.9808	MWI	43.5483870967742	Africa	Southern Africa
103	102	malaysia	0.940609756097561	MYS	45.4545454545455	Asia	South East Asia
104	103	maldives	0.995	MDV	100	Asia	NA
105	104	mali	0.883846153846154	MLI	22.7272727272727	Africa	Western Africa
106	105	malta	1	MLT	75	Europe	NA
107	106	martinique	0.36	MTQ	20	Central America/Caribbean	NA
108	107	mauritania	0.877272727272727	MRT	40	Africa	Western Africa
109	108	mauritius	0.99	MUS	50	Africa	Western Indian Ocean
110	109	mexico	0.937631578947368	MEX	46.9107551487414	Central America/Caribbean	Meso America
111	110	moldova	0.97	MDA	100	Europe	Eastern Europe
112	111	mongolia	0.98	MNG	66.6666666666667	Asia	Northeast Asia
113	112	montenegro	0.94	MNE	100	Europe	NA
114	113	morocco	0.921111111111111	MAR	68.75	Africa	Northern Africa
115	114	mozambique	0.959166666666667	MOZ	40.625	Africa	Southern Africa
116	115	n cyprus	0.963333333333333	CYP	83.3333333333333	Asia	NA
117	116	namibia	0.9715625	NAM	38.8235294117647	Africa	Southern Africa
118	117	nauru	0.995	NRU	100	Oceania	NA
119	118	nepal	0.975945945945946	NPL	46.0674157303371	Asia	South Asia
120	119	netherlands	0.9825	NLD	100	Europe	Western Europe
121	120	new caledonia	0.932	NCL	33.3333333333333	Oceania	NA
122	121	nicaragua	0.94514705882353	NIC	58.974358974359	Central America/Caribbean	Meso America
123	122	niger	0.88	NER	31.4814814814815	Africa	Western Africa
124	123	nigeria	0.924705882352941	NGA	20.3125	Africa	Western Africa
125	124	north korea	0.992222222222222	PRK	81.8181818181818	Asia	NA
126	125	norway	0.983333333333333	NOR	100	Europe	Western Europe
127	126	oman	0.998888888888889	OMN	48.3870967741936	Asia	Arabian Peninsula
128	127	pakistan	0.947142857142857	PAK	41.9753086419753	Asia	South Asia
129	128	palau	0.996666666666667	PLW	42.8571428571429	Oceania	NA
130	129	panama	0.94031746031746	PAN	42.483660130719	Central America/Caribbean	Meso America
131	130	papua new guinea	0.748666666666667	PNG	17.7083333333333	Oceania	South Pacific
132	131	paraguay	0.968571428571429	PRY	35.5555555555556	South America	South America
133	132	peru	0.893333333333334	PER	31.7596566523605	South America	South America
134	133	philippines	0.975333333333333	PHL	23.9130434782609	Asia	South East Asia
135	134	poland	0.988	POL	100	Europe	Central Europe
136	135	portugal	0.984166666666667	PRT	100	Europe	Western Europe
137	136	puerto rico	0.97	PRI	29.4117647058823	Central America/Caribbean	NA
138	137	qatar	0.9975	QAT	72.7272727272727	Asia	NA
139	138	republic of the congo	0.918571428571429	COG	15.929203539823	Africa	NA
140	139	romania	0.978	ROU	100	Europe	Central Europe
141	140	russia	0.983	RUS	75.5555555555556	Europe	Eastern Europe
142	141	rwanda	0.911875	RWA	33.3333333333333	Africa	Eastern Africa
143	142	saint lucia	0.625	LCA	25	Central America/Caribbean	NA
144	143	saudi arabia	0.978333333333333	SAU	48.4848484848485	Asia	Arabian Peninsula
145	144	senegal	0.935833333333333	SEN	21.7391304347826	Africa	Western Africa
146	145	serbia	0.97125	SRB	100	Europe	NA
147	146	seychelles	0.99	SYC	25	Africa	NA
148	147	sierra leone	0.915555555555556	SLE	20	Africa	Western Africa
149	148	singapore	0.943207547169811	SGP	69.5121951219512	Asia	NA
150	149	slovakia	0.988	SVK	100	Europe	Central Europe
151	150	slovenia	0.971333333333333	SVN	100	Europe	Central Europe
152	151	solomon islands	0.988	SLB	26.0869565217391	Oceania	South Pacific
153	152	somalia	0.971363636363636	SOM	25.2525252525252	Africa	NA
154	153	south africa	0.949	ZAF	42.9752066115703	Africa	Southern Africa
155	154	south korea	0.9925	KOR	69.2307692307692	Asia	Northeast Asia
156	155	south sudan	0.875	SSD	24.4274809160305	Africa	NA
157	156	spain	0.984666666666667	ESP	100	Europe	Western Europe
158	157	sri lanka	0.921785714285714	LKA	32.4324324324324	Asia	South Asia
159	158	st kitts and nevis	0.99	KNA	100	Central America/Caribbean	NA
160	159	st vincent and the grenadines	1	VCT	25	Central America/Caribbean	NA
161	160	sudan	0.925555555555555	SDN	28.7671232876712	Africa	Northern Africa
162	161	suriname	0.87075	SUR	50.6172839506173	South America	NA
163	162	swaziland	0.943714285714286	SWZ	61.4035087719298	Africa	Southern Africa
164	163	sweden	0.983333333333333	SWE	100	Europe	Western Europe
165	164	switzerland	0.986666666666667	CHE	100	Europe	Western Europe
166	165	syria	0.98695652173913	SYR	46.2686567164179	Asia	Mashriq
167	166	taiwan	0.958055555555556	TWN	71.875	Asia	Northeast Asia
168	167	tajikistan	0.991666666666667	TJK	73.6842105263158	Asia	Central Asia
169	168	tanzania	0.9525	TZA	23.8993710691824	Africa	Southern Africa
170	169	thailand	0.943139534883721	THA	45.2488687782805	Asia	South East Asia
171	170	togo	0.936666666666667	TGO	18.75	Africa	Western Africa
172	171	trinidad and tobago	0.9509375	TTO	59.2592592592593	South America	NA
173	172	tunisia	0.934285714285714	TUN	78.2608695652174	Africa	Northern Africa
174	173	turkey	0.986521739130435	TUR	45.3125	Asia	Central Europe
175	174	turkmenistan	0.981875	TKM	60.6060606060606	Asia	Central Asia
176	175	uganda	0.9365	UGA	21.1009174311927	Africa	Eastern Africa
177	176	ukraine	0.987	UKR	100	Europe	Eastern Europe
178	177	united arab emirates	0.998571428571429	ARE	48	Asia	NA
179	178	united kingdom	0.986666666666667	GBR	100	Europe	Western Europe
180	179	uruguay	0.968571428571429	URY	35.5555555555556	South America	South America
181	180	usa	0.940584415584416	USA	95.8579881656805	North America	NA
182	181	uzbekistan	0.991666666666667	UZB	66.6666666666667	Asia	Central Asia
183	182	vanuatu	0.996666666666667	VUT	50	Oceania	NA
184	183	venezuela	0.909850746268657	VEN	37.3134328358209	South America	South America
185	184	vietnam	0.929113924050633	VNM	40.9836065573771	Asia	NA
186	185	western sahara	0.875	ESH	70	Africa	NA
187	186	yemen	0.943333333333333	YEM	41.3793103448276	Asia	Arabian Peninsula
188	187	zambia	0.946551724137931	ZMB	31.3131313131313	Africa	Southern Africa
189	188	zimbabwe	0.96175	ZWE	46.5909090909091	Africa	Southern Africa
