# Supplementary material for: An artificial intelligence model to identify snakes from across the world: Opportunities and challenges for global health and herpetology
Source: PLoS Negl Trop Dis. 2022 Aug 15;16(8):e0010647. doi: 10.1371/journal.pntd.0010647 (PMC9426939; doi:10.1371/journal.pntd.0010647)
Supplement: S9 Data — (CSV) [file pntd.0010647.s015.csv]

	country	ISO3	mean.accuracy	percentspecies	continent
1	afghanistan	AFG	0.896111111111111	57	Asia
2	albania	ALB	0.91	94	Europe
3	algeria	DZA	0.895	68	Africa
4	angola	AGO	0.870857142857143	28	Africa
5	anguilla	AIA	0.96	50	Central America/Caribbean
6	antigua and barbuda	ATG	0.716666666666667	38	Central America/Caribbean
7	argentina	ARG	0.87775	32	South America
8	armenia	ARM	0.892666666666667	64	Asia
9	aruba	ABW	0.81	75	Central America/Caribbean
10	australia	AUS	0.879866666666667	34	Australia/Oceania
11	austria	AUT	0.85875	100	Europe
12	azerbaijan	AZE	0.899473684210526	64	Europe
13	bahamas	BHS	0.932	42	Central America/Caribbean
14	bahrain	BHR	NA	0	Asia
15	bangladesh	BGD	0.888684210526316	54	Asia
16	barbados	BRB	0.82	20	Central America/Caribbean
17	belarus	BLR	0.89	100	Europe
18	belgium	BEL	0.89	100	Europe
19	belize	BLZ	0.839661016949153	79	Central America/Caribbean
20	benin	BEN	0.828666666666667	23	Africa
21	bhutan	BTN	0.877894736842105	50	Asia
22	bolivia	BOL	0.88031746031746	38	South America
23	bosnia and herzegovina	BIH	0.84625	100	Europe
24	botswana	BWA	0.860882352941176	49	Africa
25	brazil	BRA	0.882857142857143	19	South America
26	brunei	BRN	0.8616	76	Asia
27	bulgaria	BGR	0.889411764705882	89	Europe
28	burkina faso	BFA	0.794444444444444	21	Africa
29	burma	MMR	0.896034482758621	45	Asia
30	burundi	BDI	0.84875	38	Africa
31	cambodia	KHM	0.864074074074074	54	Asia
32	cameroon	CMR	0.829047619047619	16	Africa
33	canada	CAN	0.894074074074074	100	North America
34	cayman islands	CYM	0.906	38	Central America/Caribbean
35	central african republic	CAF	0.82695652173913	22	Africa
36	chad	TCD	0.8	24	Africa
37	chile	CHL	0.86	62	South America
38	china	CHN	0.906363636363636	39	Asia
39	colombia	COL	0.868811881188119	33	South America
40	comoros	COM	NA	0	Africa
41	costa rica	CRI	0.839428571428571	48	Central America/Caribbean
42	croatia	HRV	0.892941176470588	100	Europe
43	cuba	CUB	0.89	14	Central America/Caribbean
44	cyprus	CYP	0.912	83	Europe
45	czech republic	CZE	0.872	100	Europe
46	democratic republic of the congo	COD	0.86	21	Africa
47	denmark	DNK	0.89	100	Europe
48	djibouti	DJI	0.903333333333333	40	Africa
49	dominica	DMA	0.595	40	Central America/Caribbean
50	dominican republic	DOM	1	5	Central America/Caribbean
51	east timor	TLS	0.822222222222222	64	Asia
52	ecuador	ECU	0.875844155844156	33	South America
53	egypt	EGY	0.873157894736842	57	Africa
54	el salvador	SLV	0.841041666666667	63	Central America/Caribbean
55	equatorial guinea	GNQ	0.868888888888889	27	Africa
56	eritrea	ERI	0.846153846153846	36	Africa
57	estonia	EST	0.89	100	Europe
58	ethiopia	ETH	0.861	21	Africa
59	fiji	FJI	0.805	44	Australia/Oceania
60	finland	FIN	0.89	100	Europe
61	france	FRA	0.878	94	Europe
62	french guiana	GUF	0.869090909090909	59	South America
63	gabon	GAB	0.829166666666667	18	Africa
64	gambia	GMB	0.786363636363636	23	Africa
65	georgia	GEO	0.904375	67	Asia
66	germany	DEU	0.871428571428571	100	Europe
67	ghana	GHA	0.843333333333333	17	Africa
68	greece	GRC	0.911666666666667	96	Europe
69	grenada	GRD	0.8075	57	Central America/Caribbean
70	guadeloupe	GLP	0.82	12	Central America/Caribbean
71	guatemala	GTM	0.850675675675676	51	Central America/Caribbean
72	guinea	GIN	0.803076923076923	23	Africa
73	guinea bissau	GNB	0.783333333333333	29	Africa
74	guyana	GUY	0.863725490196078	58	South America
75	haiti	HTI	1	15	Central America/Caribbean
76	honduras	HND	0.857123287671233	49	Central America/Caribbean
77	hong kong	HKG	0.895714285714286	73	Asia
78	hungary	HUN	0.874285714285714	100	Europe
79	india	IND	0.897820512820513	30	Asia
80	indonesia	IDN	0.869789473684211	28	Asia
81	iran	IRN	0.8975	43	Asia
82	iraq	IRQ	0.898846153846154	56	Asia
83	israel	ISR	0.882608695652174	51	Asia
84	italy	ITA	0.877916666666667	100	Europe
85	ivory coast	CIV	0.812666666666667	17	Africa
86	jamaica	JAM	1	9	Central America/Caribbean
87	japan	JPN	0.865625	42	Asia
88	jordan	JOR	0.914761904761905	49	Asia
89	kazakhstan	KAZ	0.887142857142857	76	Asia
90	kenya	KEN	0.888148148148148	25	Africa
91	kosovo	NA	0.86625	100	Europe
92	kuwait	KWT	0.91625	82	Asia
93	kyrgyzstan	KGZ	0.911111111111111	67	Asia
94	laos	LAO	0.90125	56	Asia
95	latvia	LVA	0.89	100	Europe
96	lebanon	LBN	0.883846153846154	52	Asia
97	lesotho	LSO	0.878333333333333	55	Africa
98	liberia	LBR	0.787	18	Africa
99	libya	LBY	0.855	67	Africa
100	lithuania	LTU	0.89	100	Europe
101	luxembourg	LUX	0.89	100	Europe
102	macedonia	MKD	0.903125	100	Europe
103	madagascar	MDG	0.94	12	Africa
104	malawi	MWI	0.881538461538461	44	Africa
105	malaysia	MYS	0.888804347826087	45	Asia
106	maldives	MDV	0.905	100	Asia
107	mali	MLI	0.794166666666667	23	Africa
108	malta	MLT	0.96	75	Europe
109	martinique	MTQ	0.69	20	Central America/Caribbean
110	mauritania	MRT	0.826363636363636	40	Africa
111	mauritius	MUS	0.896666666666667	50	Africa
112	mexico	MEX	0.872974358974359	47	Central America/Caribbean
113	moldova	MDA	0.842857142857143	100	Europe
114	mongolia	MNG	0.90875	67	Asia
115	montenegro	MNE	0.905	100	Europe
116	morocco	MAR	0.868	69	Africa
117	mozambique	MOZ	0.872777777777778	41	Africa
118	n cyprus	CYP	0.92	100	Europe
119	namibia	NAM	0.886060606060606	39	Africa
120	nauru	NRU	0.88	100	Australia/Oceania
121	nepal	NPL	0.9065	46	Asia
122	netherlands	NLD	0.89	100	Europe
123	new caledonia	NCL	0.87	33	Australia/Oceania
124	nicaragua	NIC	0.847647058823529	59	Central America/Caribbean
125	niger	NER	0.842857142857143	29	Africa
126	nigeria	NGA	0.8305	20	Africa
127	north korea	PRK	0.865	82	Asia
128	norway	NOR	0.89	100	Europe
129	oman	OMN	0.945384615384615	48	Asia
130	pakistan	PAK	0.927666666666667	42	Asia
131	palau	PLW	0.883333333333333	43	Australia/Oceania
132	palestine	PSE	NA	0	Asia
133	panama	PAN	0.858125	42	Central America/Caribbean
134	papua new guinea	PNG	0.82875	18	Australia/Oceania
135	paraguay	PRY	0.891333333333333	36	South America
136	peru	PER	0.862816901408451	32	South America
137	philippines	PHL	0.808709677419355	24	Asia
138	poland	POL	0.872	100	Europe
139	portugal	PRT	0.857692307692308	100	Europe
140	puerto rico	PRI	1	29	Central America/Caribbean
141	qatar	QAT	0.908333333333333	73	Asia
142	republic of the congo	COG	0.828666666666667	16	Africa
143	romania	ROU	0.857	100	Europe
144	russia	RUS	0.895862068965517	76	Asia
145	rwanda	RWA	0.85375	33	Africa
146	saint lucia	LCA	0.595	25	Central America/Caribbean
147	sao tome and principe	STP	NA	11	Africa
148	saudi arabia	SAU	0.923333333333333	48	Asia
149	senegal	SEN	0.793333333333333	22	Africa
150	serbia	SRB	0.86625	100	Europe
151	seychelles	SYC	0.82	25	Africa
152	sierra leone	SLE	0.81	20	Africa
153	singapore	SGP	0.875925925925926	70	Asia
154	slovakia	SVK	0.872	100	Europe
155	slovenia	SVN	0.874	100	Europe
156	solomon islands	SLB	0.823333333333333	26	Australia/Oceania
157	somalia	SOM	0.871363636363636	25	Africa
158	south africa	ZAF	0.889019607843137	43	Africa
159	south korea	KOR	0.84375	69	Asia
160	south sudan	SSD	0.835	24	Africa
161	spain	ESP	0.855625	100	Europe
162	sri lanka	LKA	0.893666666666667	32	Asia
163	st kitts and nevis	KNA	0.91	100	Central America/Caribbean
164	st vincent and the grenadines	VCT	1	25	Central America/Caribbean
165	sudan	SDN	0.872692307692308	29	Africa
166	suriname	SUR	0.868780487804878	51	South America
167	swaziland	SWZ	0.875428571428571	61	Africa
168	sweden	SWE	0.89	100	Europe
169	switzerland	CHE	0.873333333333333	100	Europe
170	syria	SYR	0.907037037037037	46	Asia
171	taiwan	TWN	0.901904761904762	72	Asia
172	tajikistan	TJK	0.906923076923077	74	Asia
173	tanzania	TZA	0.864242424242424	24	Africa
174	thailand	THA	0.876593406593407	45	Asia
175	togo	TGO	0.845333333333333	19	Africa
176	tonga	TON	NA	33	Australia/Oceania
177	trinidad and tobago	TTO	0.833125	59	South America
178	tunisia	TUN	0.888823529411765	78	Africa
179	turkey	TUR	0.903076923076923	45	Asia
180	turkmenistan	TKM	0.887777777777778	61	Asia
181	turks and caicos	TCA	NA	0	Central America/Caribbean
182	uganda	UGA	0.848421052631579	21	Africa
183	ukraine	UKR	0.885	100	Europe
184	united arab emirates	ARE	0.937272727272727	48	Asia
185	united kingdom	GBR	0.89	100	Europe
186	uruguay	URY	0.891333333333333	36	South America
187	usa	USA	0.901184210526316	96	North America
188	uzbekistan	UZB	0.906923076923077	67	Asia
189	vanuatu	VUT	0.805	50	Australia/Oceania
190	venezuela	VEN	0.874142857142857	37	South America
191	vietnam	VNM	0.908977272727273	41	Asia
192	western sahara	ESH	0.86	70	Africa
193	yemen	YEM	0.929	41	Asia
194	zambia	ZMB	0.864333333333333	31	Africa
195	zimbabwe	ZWE	0.876923076923077	47	Africa
